# Supplementary material
Source: PubMed Central journal article supplement (PMC5062609)

Figure S2 Targeted promoter methylation editing to activate *Dazl*-*Snrpn*-GFP reporter by dCas9-Tet1 and repress *Gapdh*-*Snrpn*-GFP reporter by dCas9-Dnmt3a

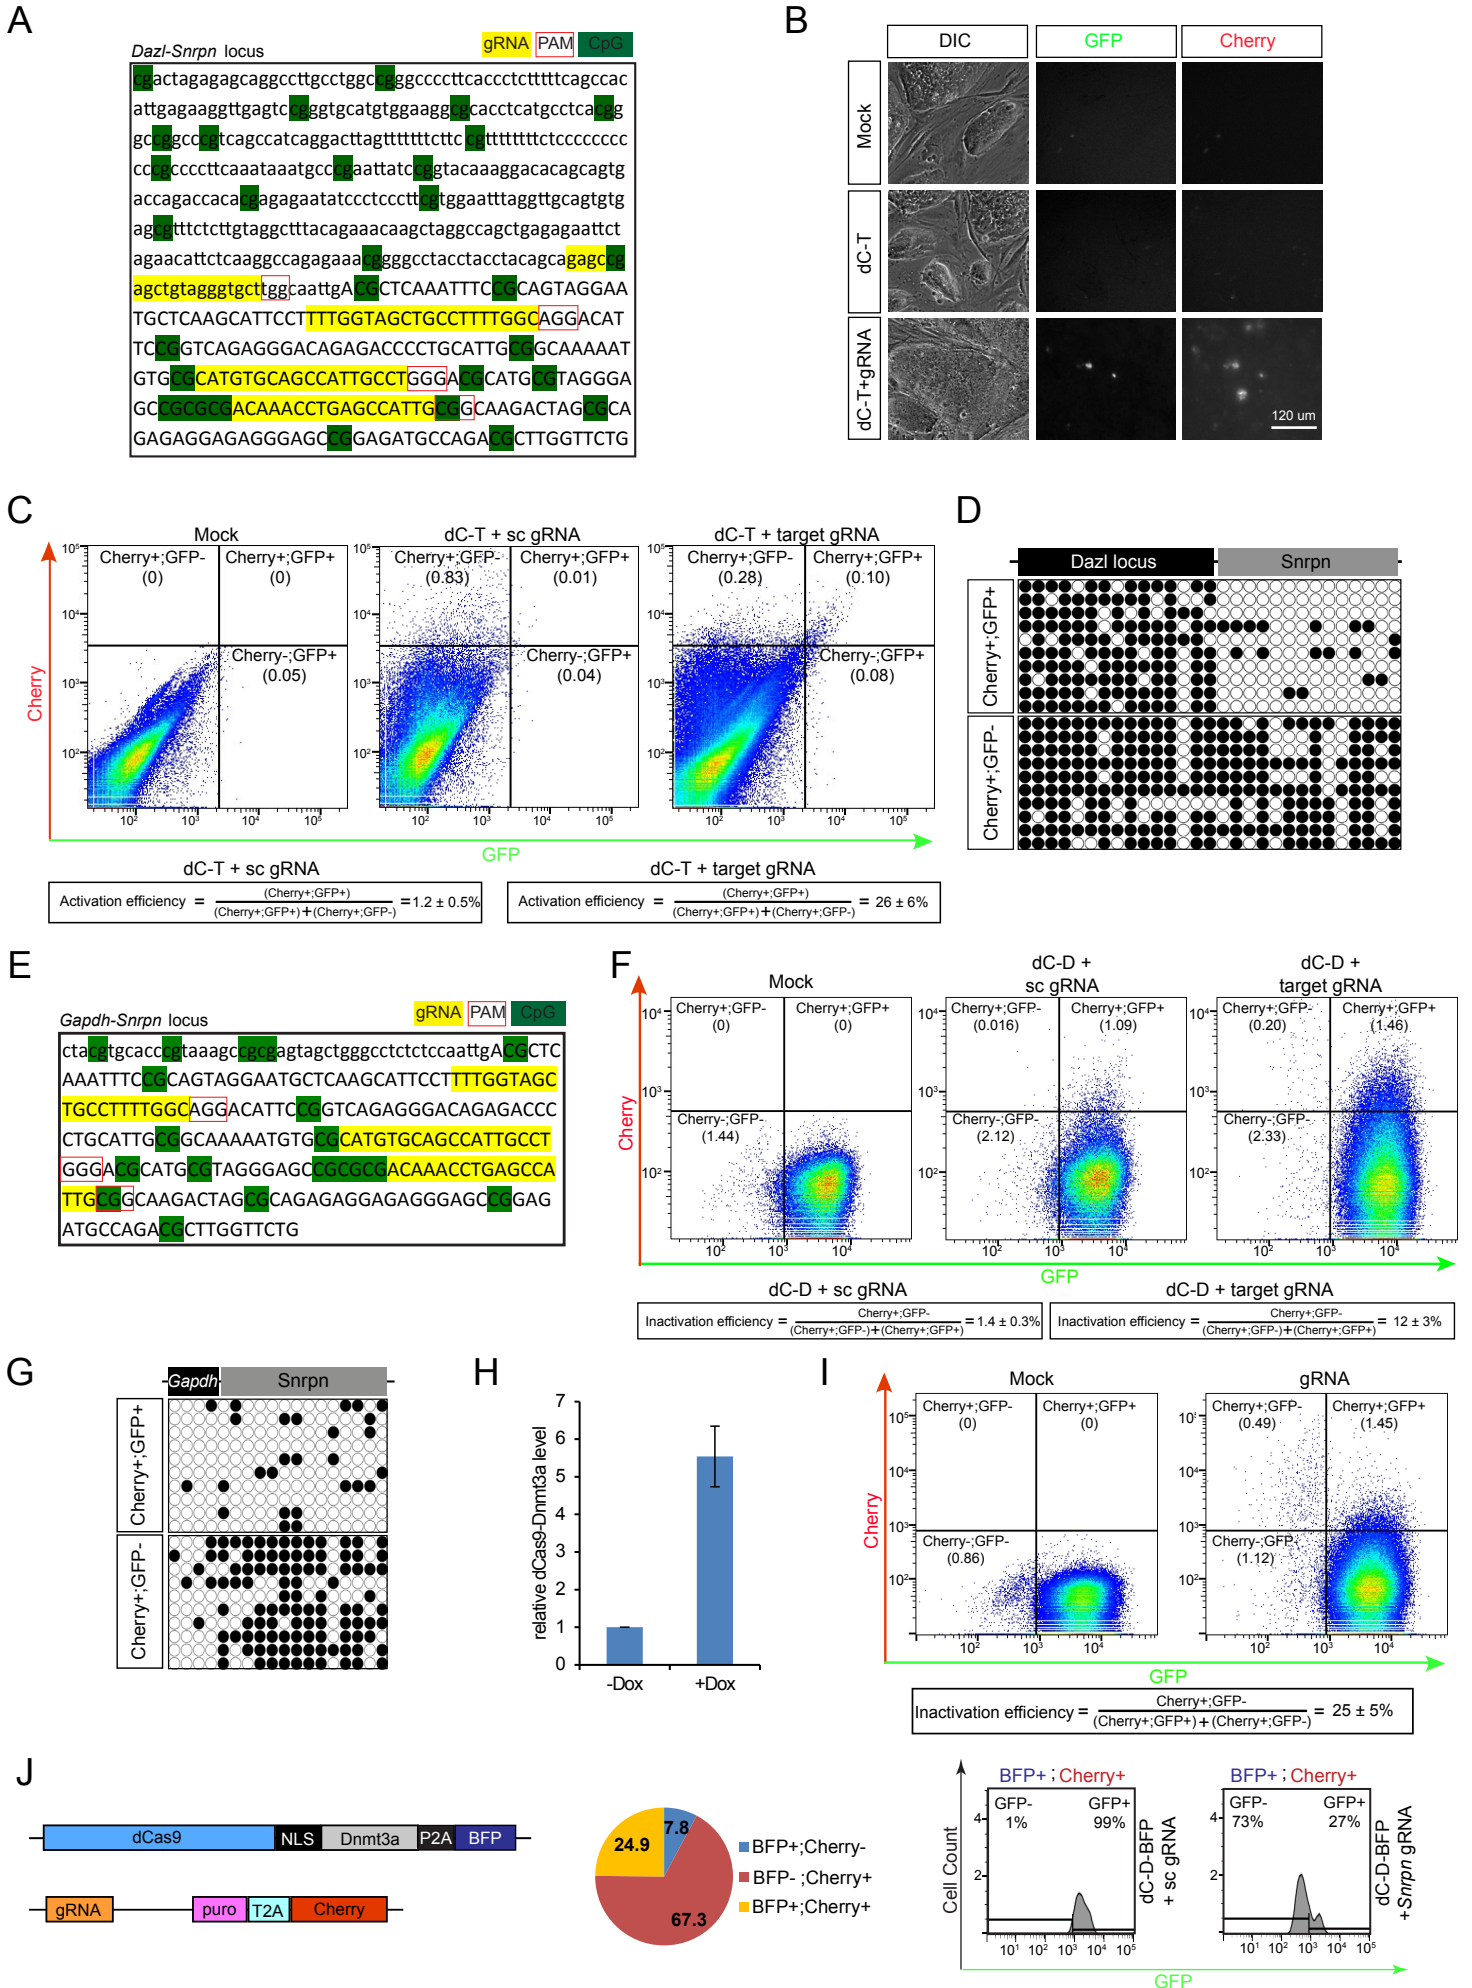

Supplement: NIHMS813126-supplement-2.pdf [file NIHMS813126-supplement-2.pdf]
