# Supplementary material
Source: PubMed Central journal article supplement (PMC5062609)

Figure S4 Targeted demethylation by dCas9-Tet1 to activate BDNF in mouse cortical neurons

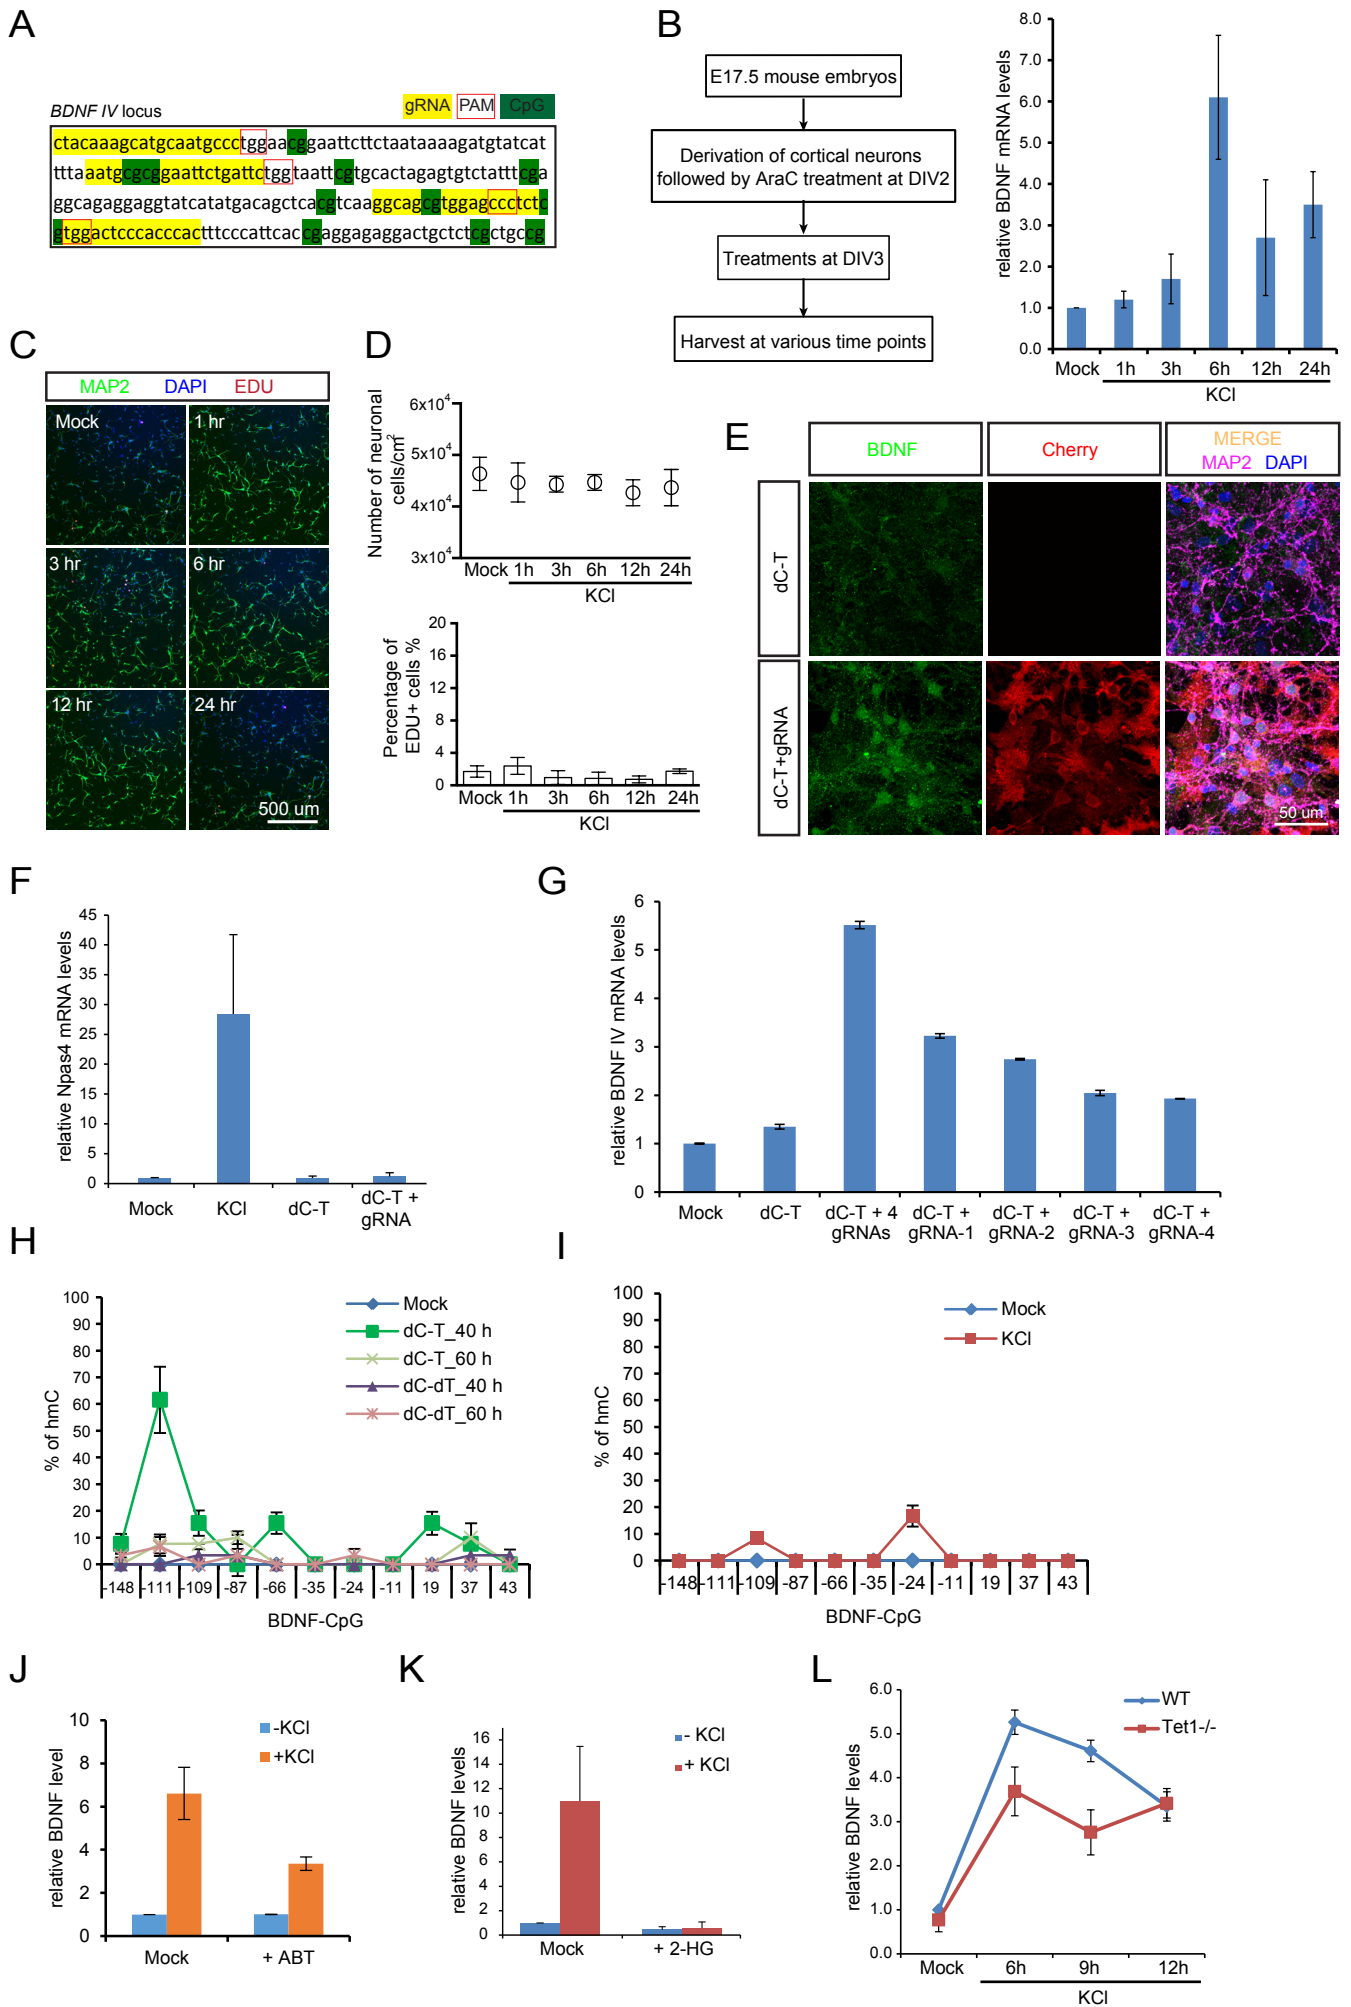

Supplement: NIHMS813126-supplement-4.pdf [file NIHMS813126-supplement-4.pdf]
